# Supplementary material
Source: Springer Nature journal article supplement (https://www.springermedizin.de/resource/supplementary/13075_2012_3613_MOESM3_ESM.pdf/9694860)

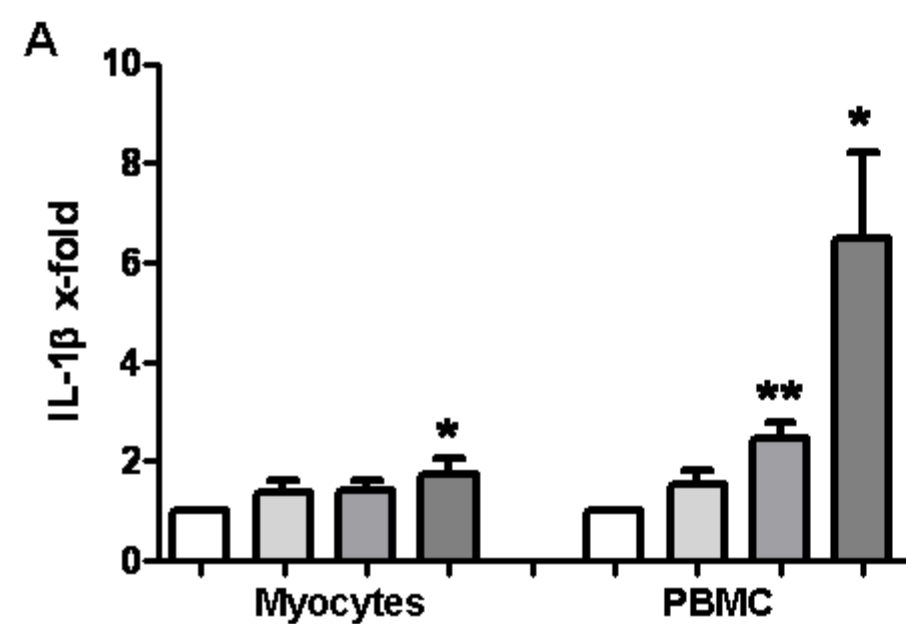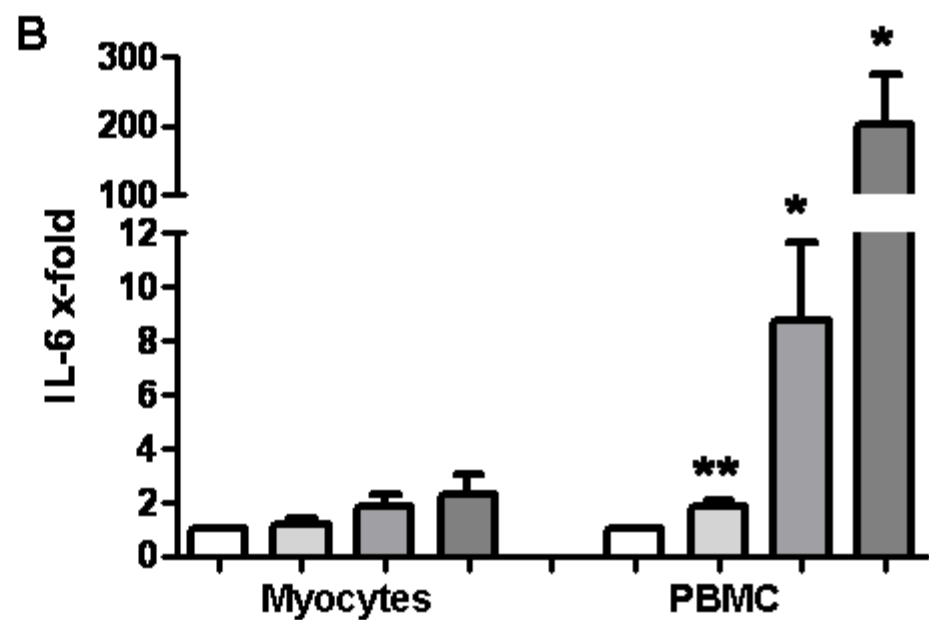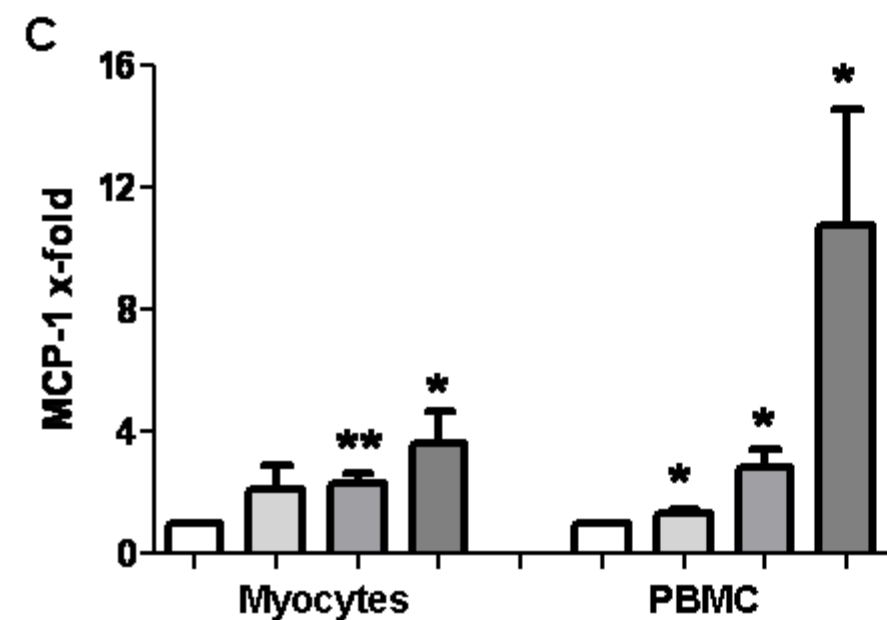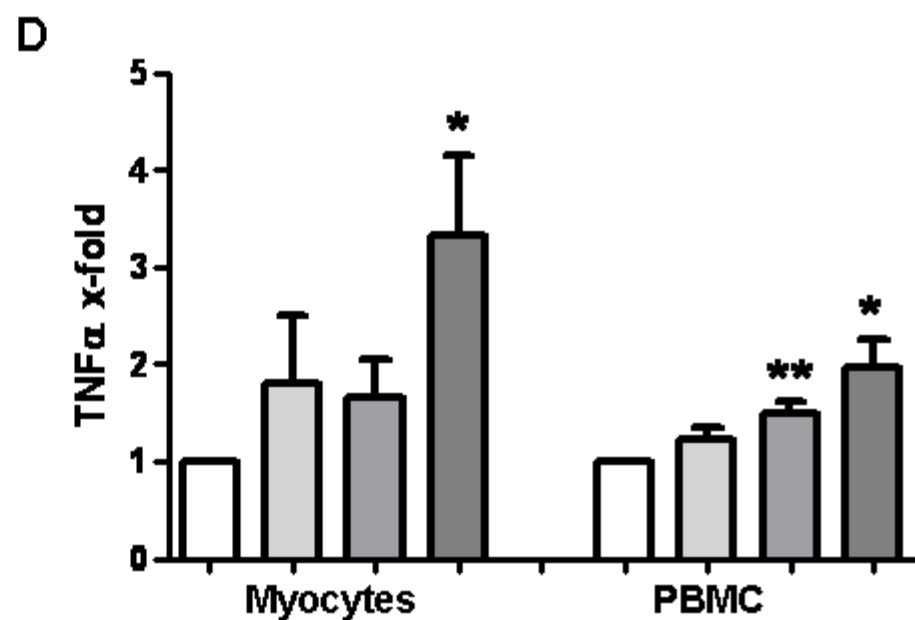

control resistin 10 ng/ml resistin 100 ng/ml resistin 1000 ng/ml

Supplement: MOESM3 [file 9694860]
